# Supplementary material for: Identifying N60D mutation in ω subunit of Escherichia coli RNA polymerase by bottom-up proteomic approach
Source: Royal Society of Chemistry journal article supplement (doi:10.1039/c0an00130a), 2010-01-01
Supplement: c0an00130a.pdf [file c0an00130a.pdf]

# Supporting Information (Appendix)

## Identifying N60D mutation in $\omega$ subunit of *Escherichia coli* RNA polymerase by bottom-up proteomic approach

Varatharajan Sabareesh <sup>1, \$, †, \*</sup>, Paramita Sarkar <sup>2, \$</sup>, Abhijit A Sardesai <sup>3</sup>, Dipankar Chatterji <sup>1, 2</sup>

<sup>1</sup> Jawaharlal Nehru Centre for Advanced Scientific Research, Jakkur, Bengaluru - 560 064, India.

<sup>2</sup> Molecular Biophysics Unit, Indian Institute of Science, Bengaluru - 560 012, India.

<sup>3</sup> Centre for DNA Fingerprinting and Diagnostics, Bldg. 7, Gruhakalpa, 5-4-399/B, Nampally, Hyderabad - 500 001, India.

<sup>\$</sup> Equal contribution

<sup>†</sup> Current Address: Institute of Genomics & Integrative Biology, New Delhi, India.  
(e-mail: v.sabareesh@igib.in)

<sup>\*</sup> Author for correspondence: e-mail: sabareesh@jncasr.ac.in; sabareesh6@gmail.com

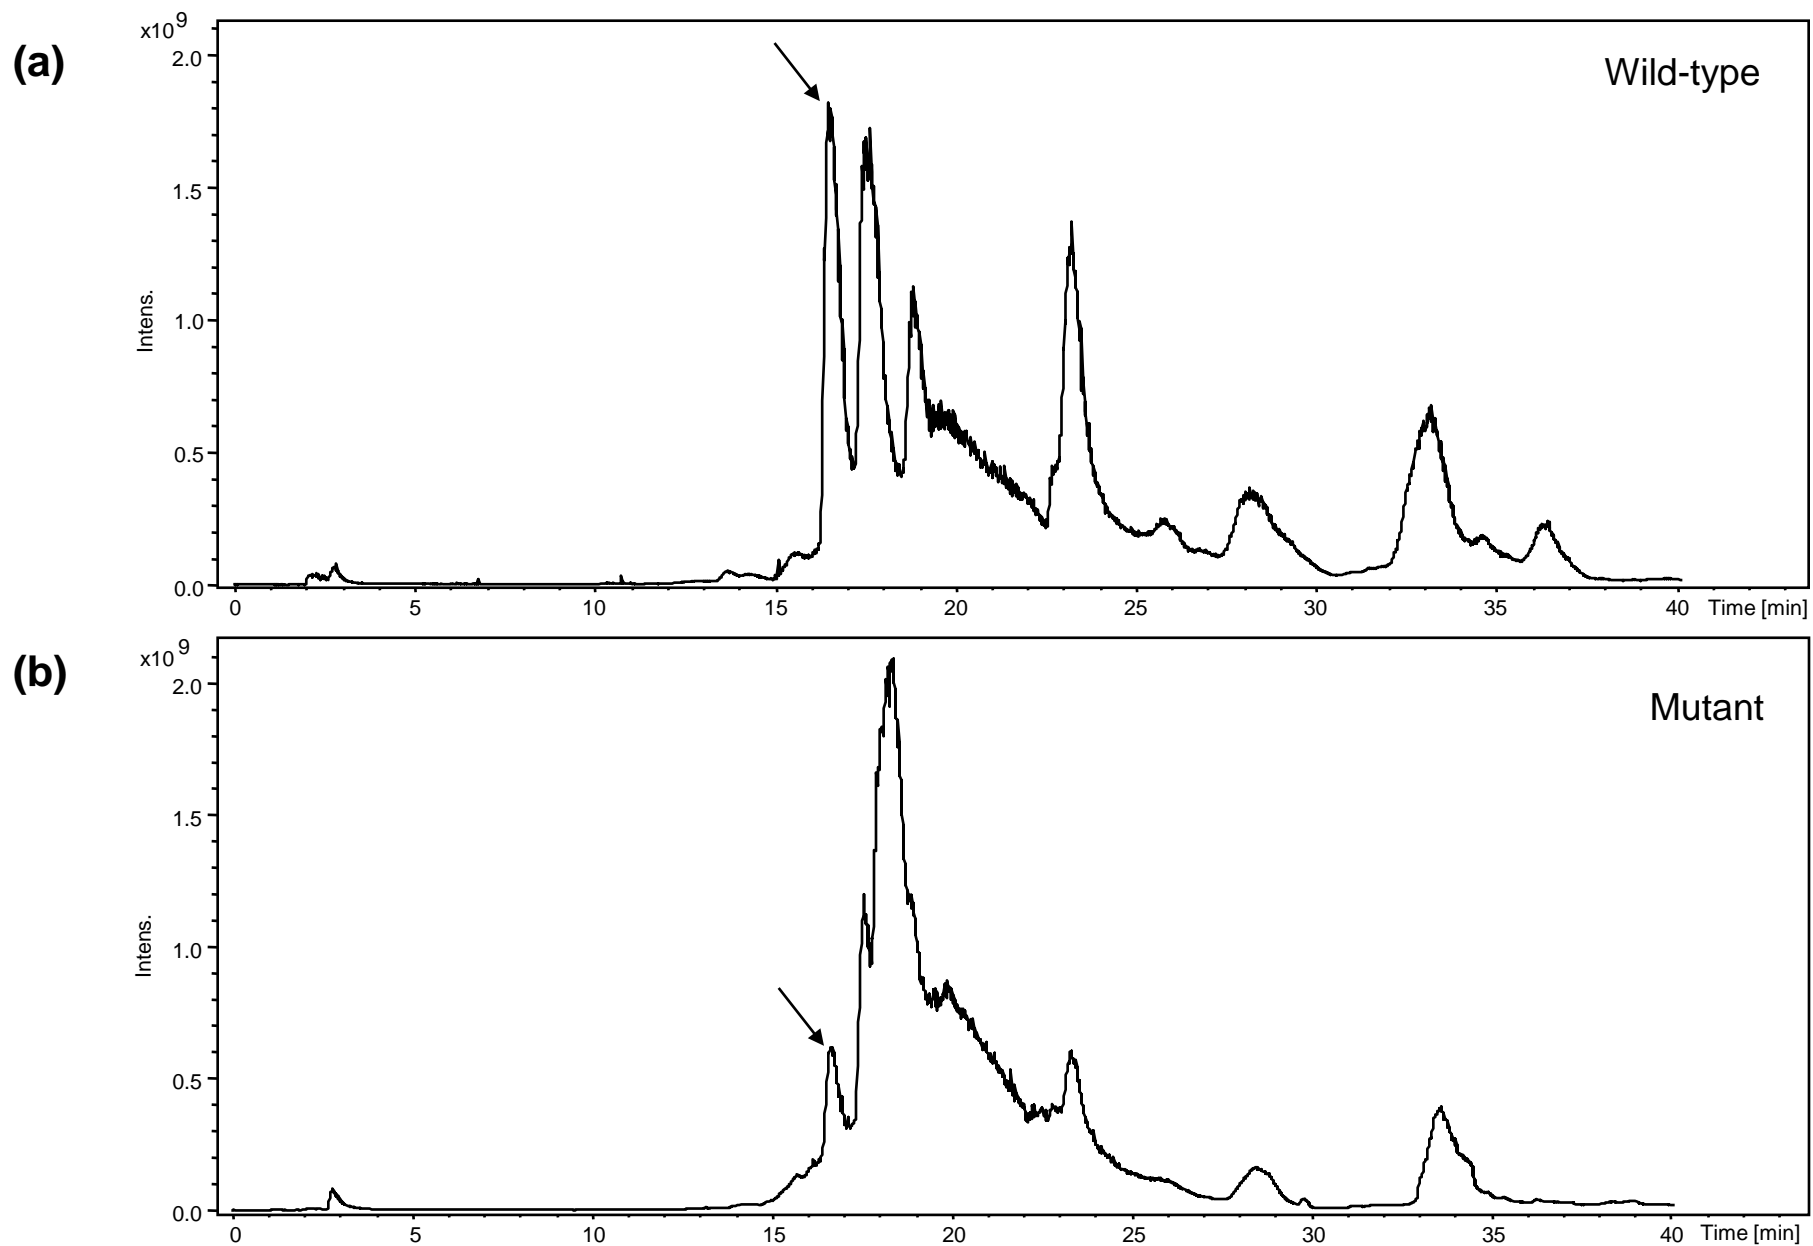

**Figure S1.** Total ion chromatograms (TICs) from LC-ESI-MS of solubilized and renatured inclusion bodies (IBs) obtained upon expressing plasmids encoding for (a) Wild-type and (b) Mutant  $\omega$  subunit of *E. coli* RNAP. The IBs were passed through a reverse phase column, Zorbax 300SB C8 (2.1 mm  $\times$  100 mm; 3.5  $\mu$ m) and a gradient elution was followed using acetonitrile and water, each containing 0.1% formic acid. The peaks that are indicated correspond to the wild-type and mutant  $\omega$  subunit of *E. coli* RNAP. (Mass spectra of these two proteins are shown in Figure S2)

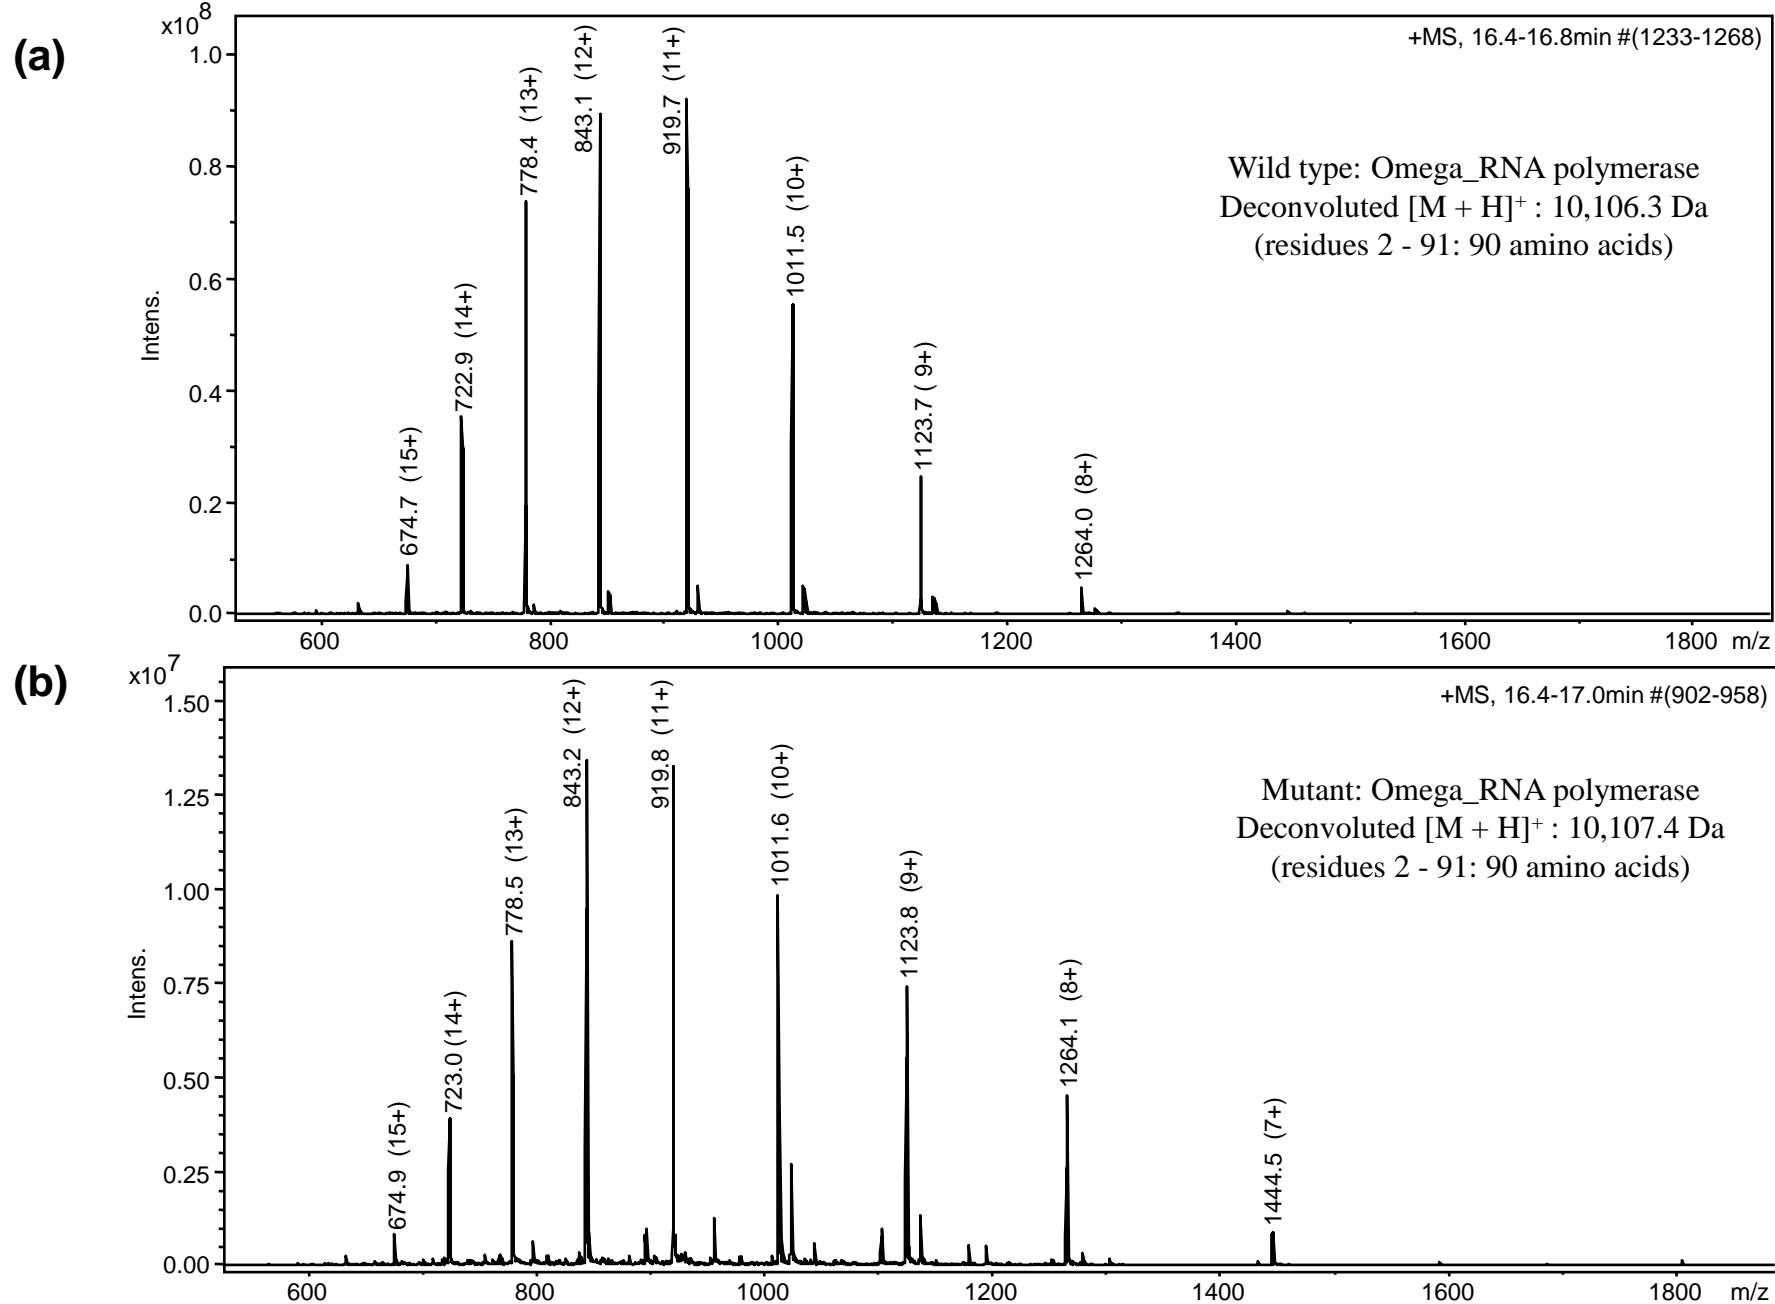

**Figure S2.** LC-ESI mass spectrum of **(a)** wild-type and **(b)** mutant  $\omega$  subunit of *E. coli* RNAP. The above mass spectra are obtained upon processing the indicated peak in the respective TIC shown in Figure S1. The molecular mass ( $[M + H]^+$ ) is obtained upon deconvoluting the mass spectrum. The molecular mass of wild-type and mutant suggests loss of N- terminus methionine, which may have occurred during processing the sample. Thus, the molecular mass corresponds to 90 amino acids, i.e., residues 2 - 91.

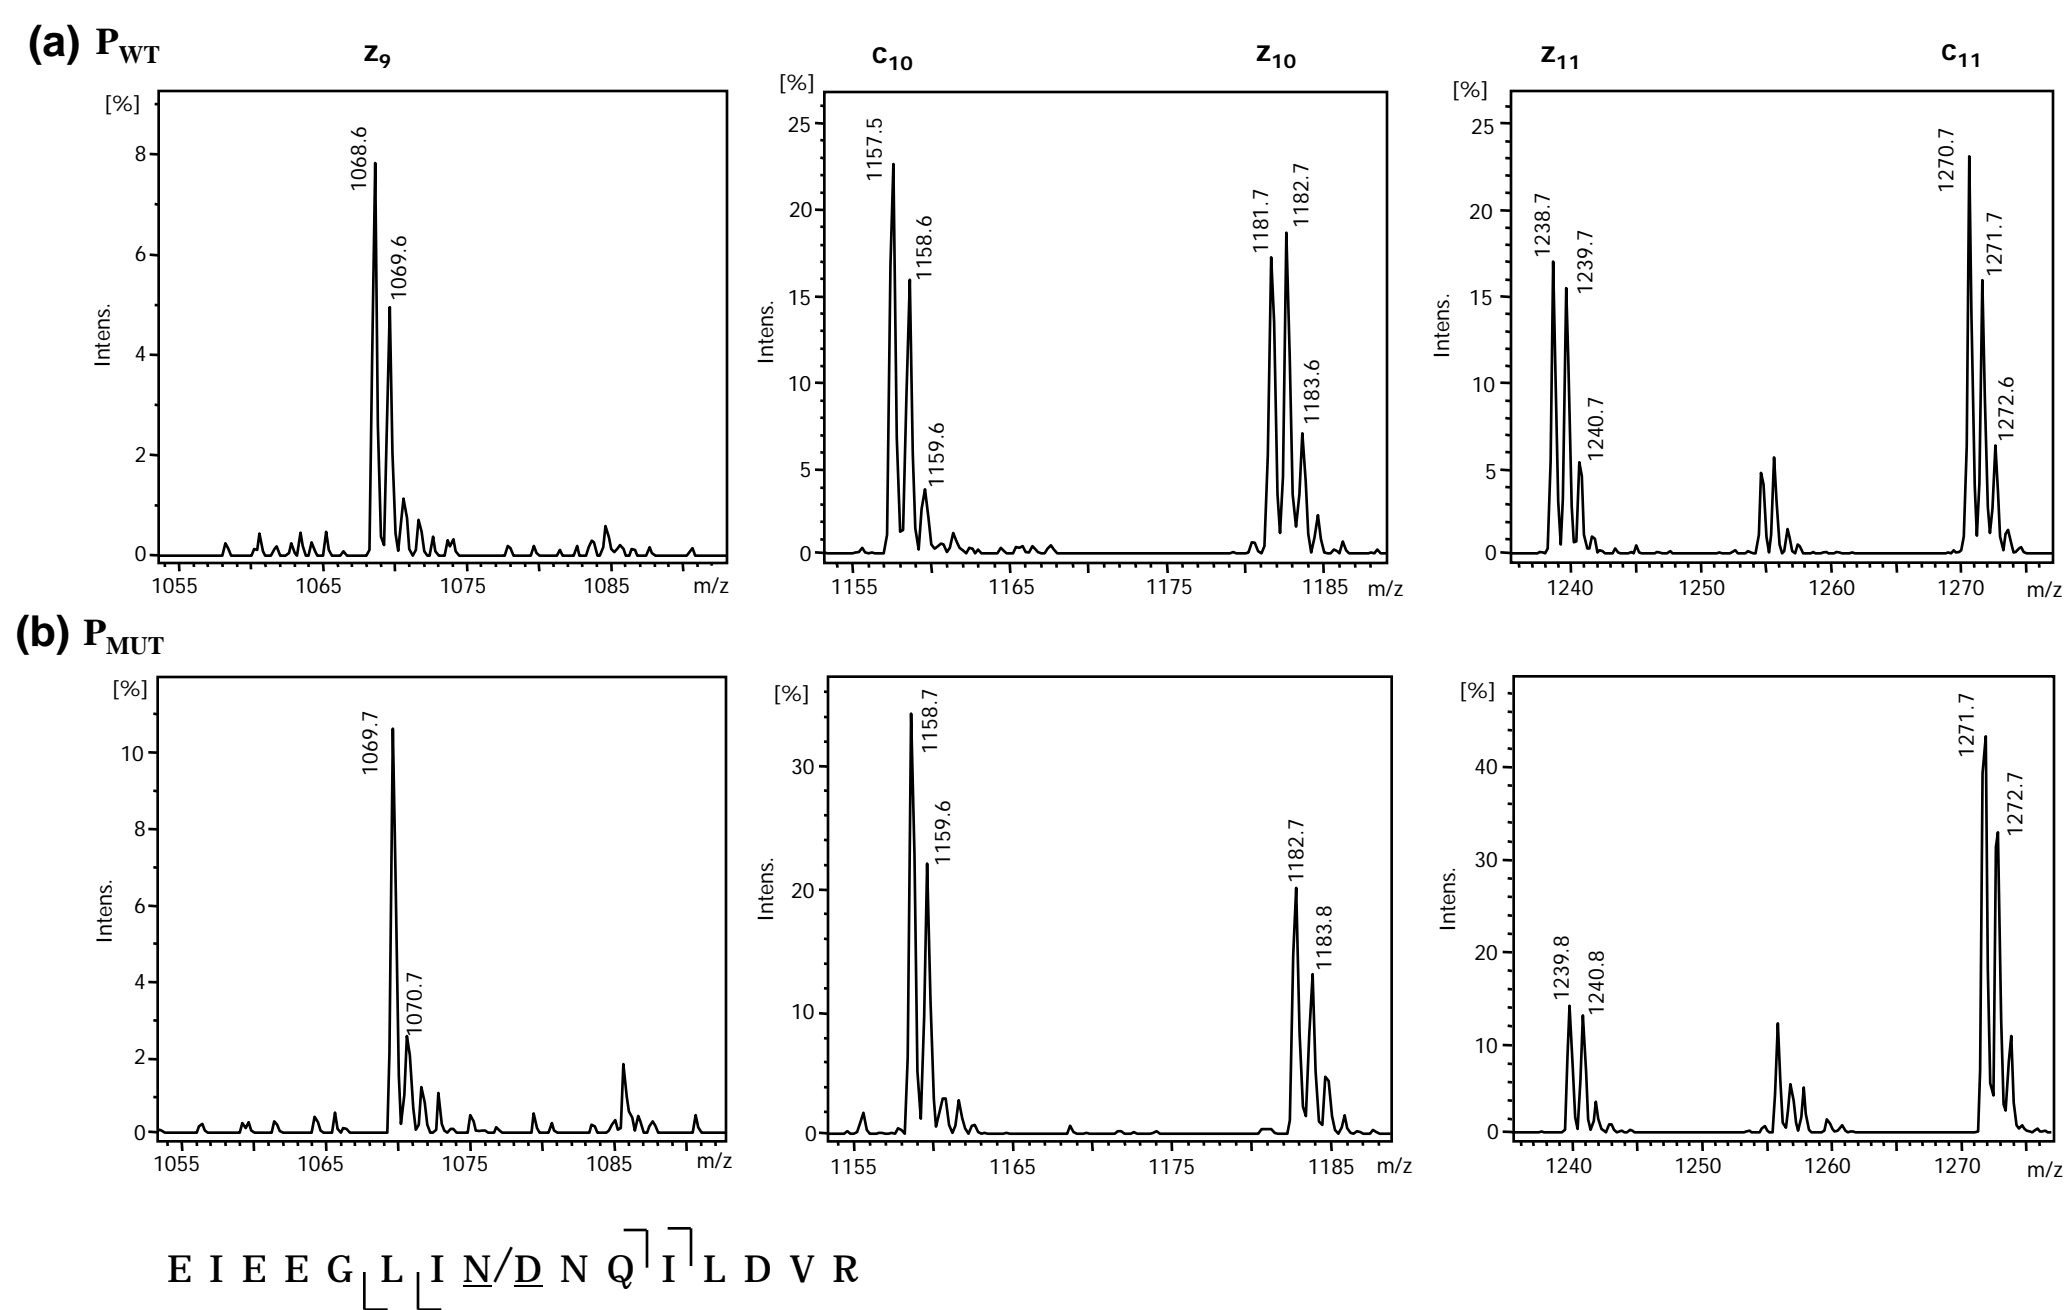

**Figure S3.** Expansion of the LC-ESI-ETD MS/MS spectra of  $[M + 3H]^{3+}$  precursor ion of (a) P<sub>WT</sub> and (b) P<sub>MUT</sub> shown in Figure 1, edited between  $m/z$  1055 -  $m/z$  1275. The signals of  $z_9$ ,  $z_{10}$ ,  $c_{10}$ ,  $c_{11}$  along with their respective isotopic peaks are shown. See Table 1 for the calculated  $m/z$  values of these  $c$ - and  $z$ - ions.

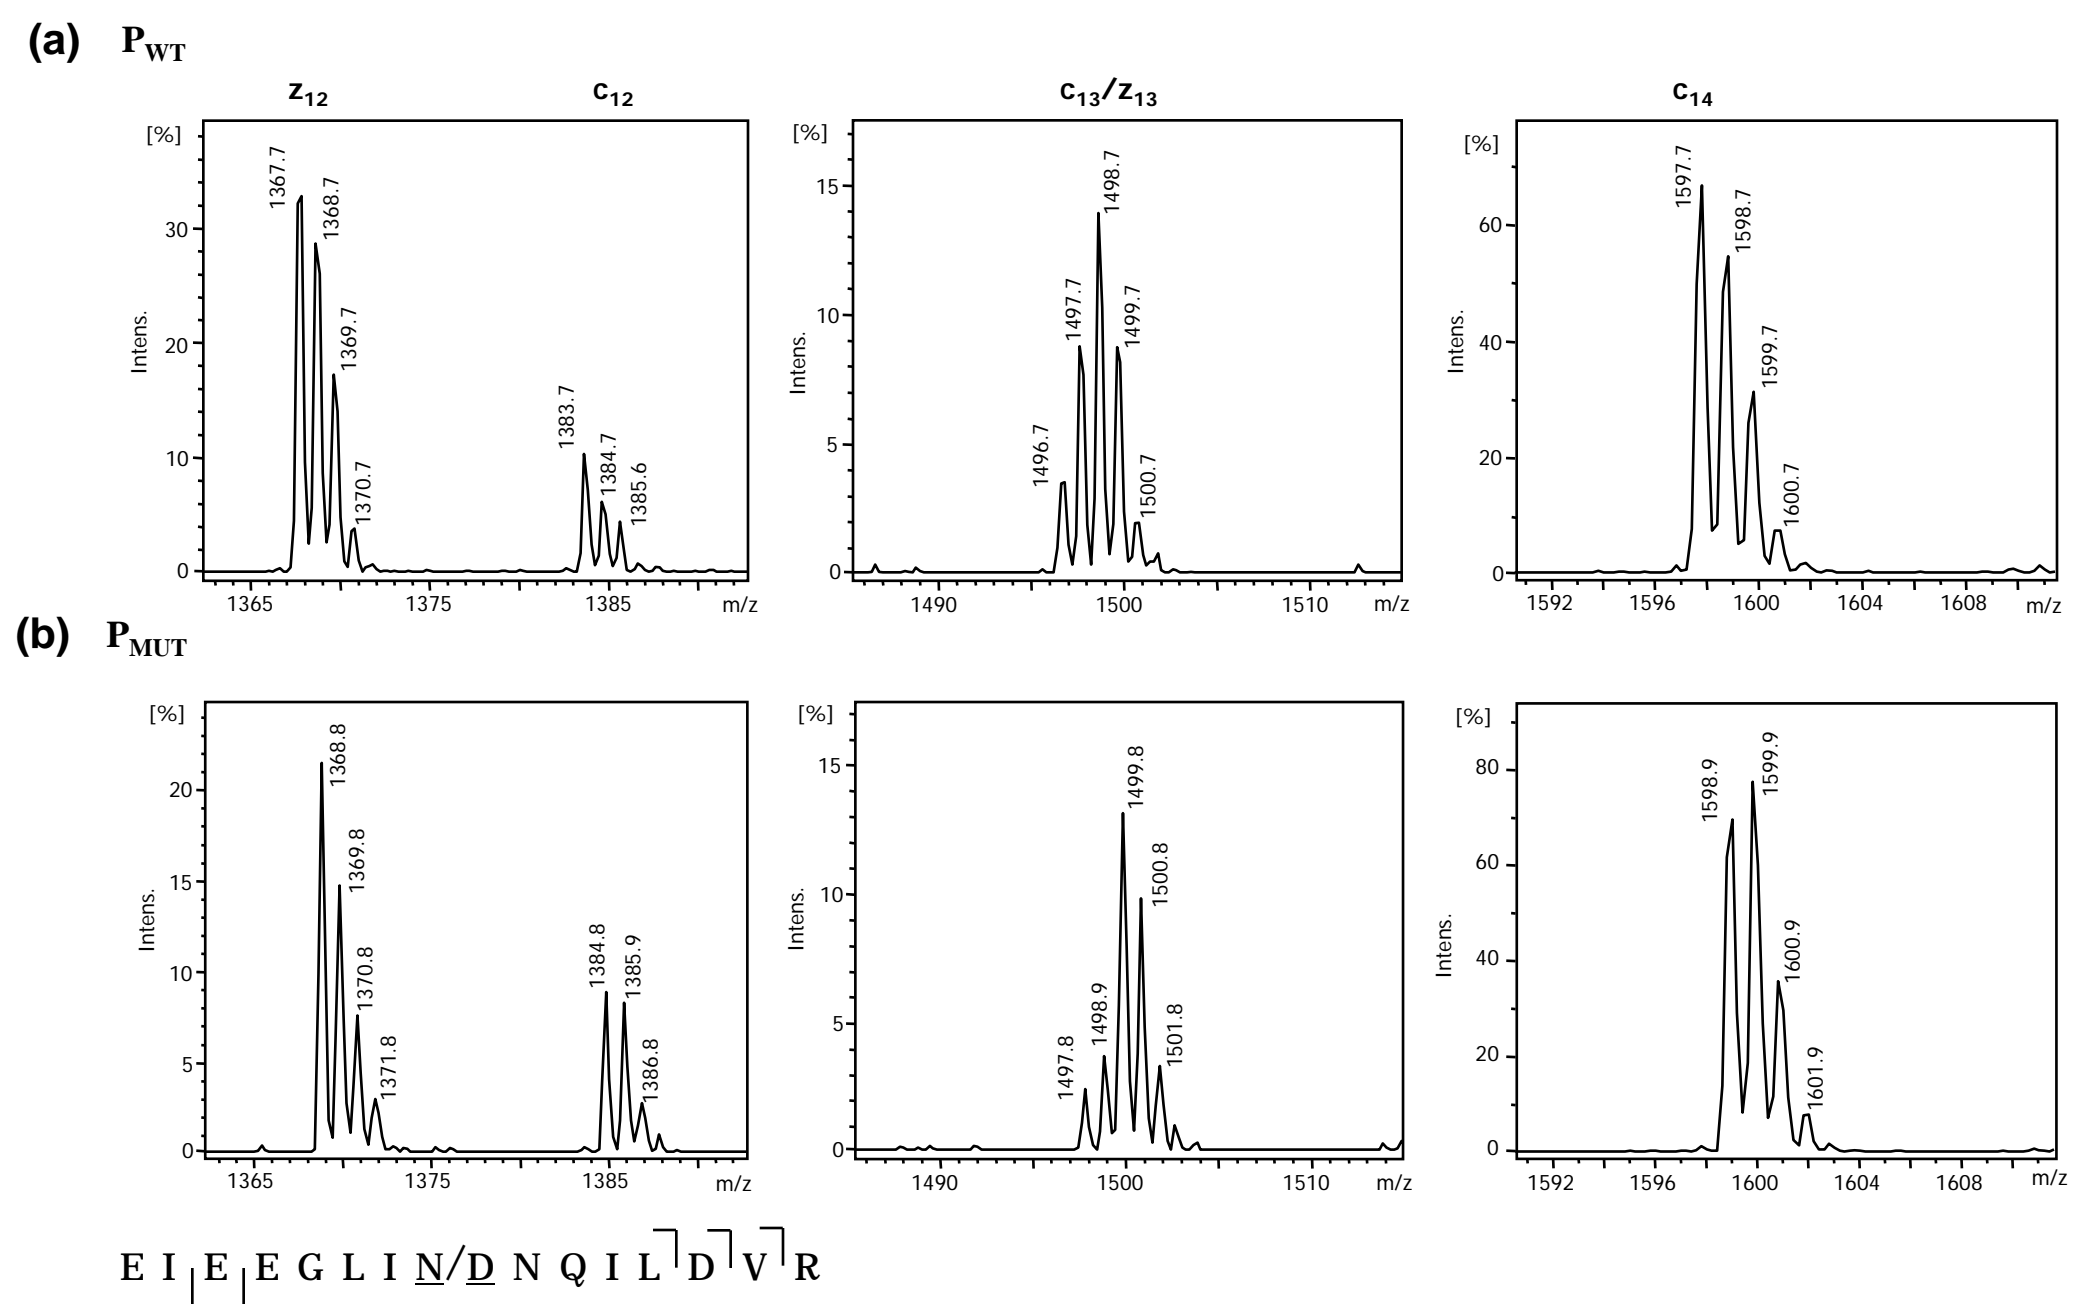

**Figure S4.** Expansion of the LC-ESI-ETD MS/MS spectra of  $[M + 3H]^{3+}$  precursor ion of (a) P<sub>WT</sub> and (b) P<sub>MUT</sub> shown in Figure 1, edited between m/z 1365 - m/z 1610. The signals of z<sub>12</sub>, z<sub>13</sub>, c<sub>12</sub>, c<sub>13</sub>, c<sub>14</sub> along with their respective isotopic peaks are shown. See Table 1 for the calculated m/z values of these c- and z- ions.

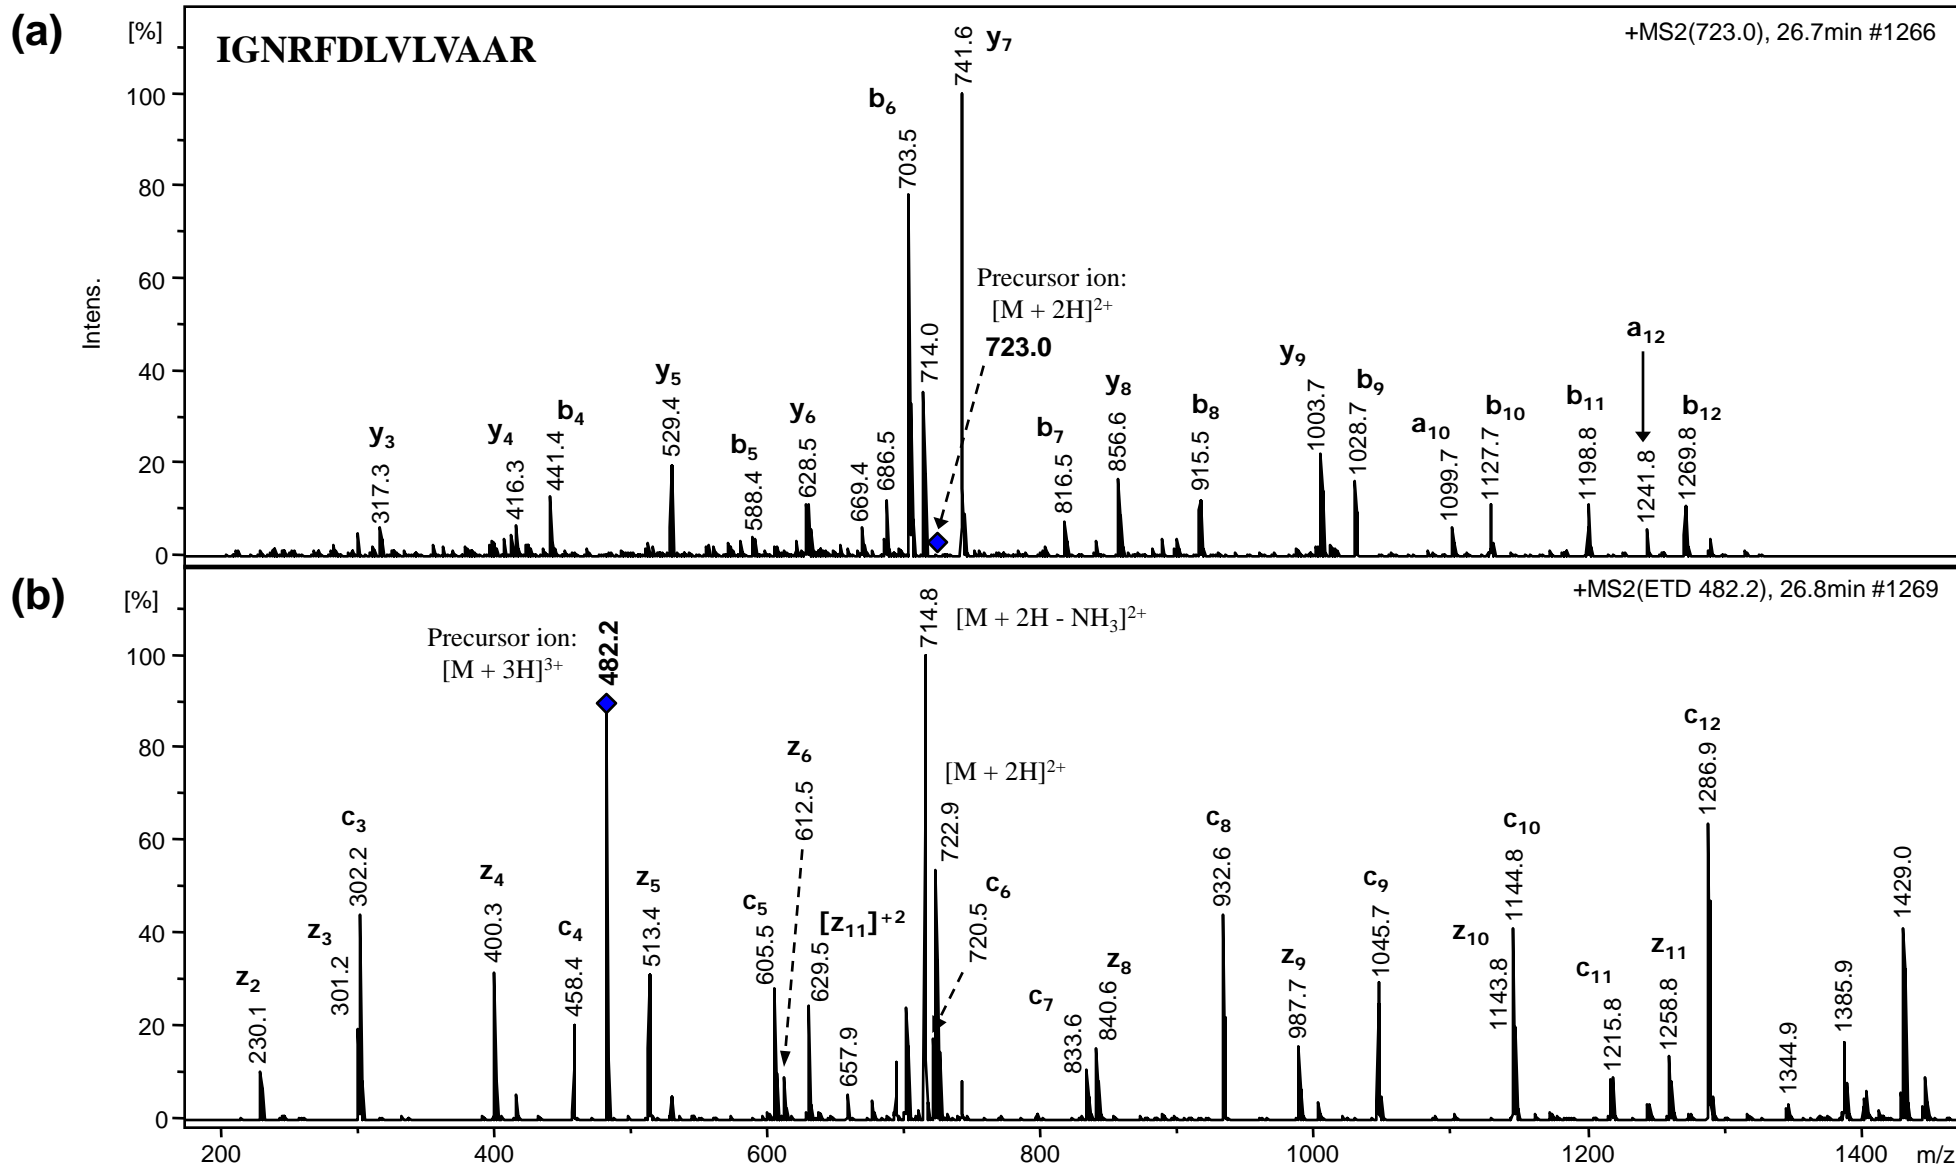

**Figure S5.** (a) LC-ESI-CID MS/MS spectrum of  $[M + 2H]^{2+}$  precursor ion  $m/z$  723.0 of tryptic peptide, **IGNRFDLVLVAAR**, residues (13 - 25) of  $\omega$  subunit of *E. coli* RNAP. (b) LC-ESI-ETD MS/MS spectrum of  $[M + 3H]^{3+}$  precursor ion  $m/z$  482.2 of same tryptic peptide.

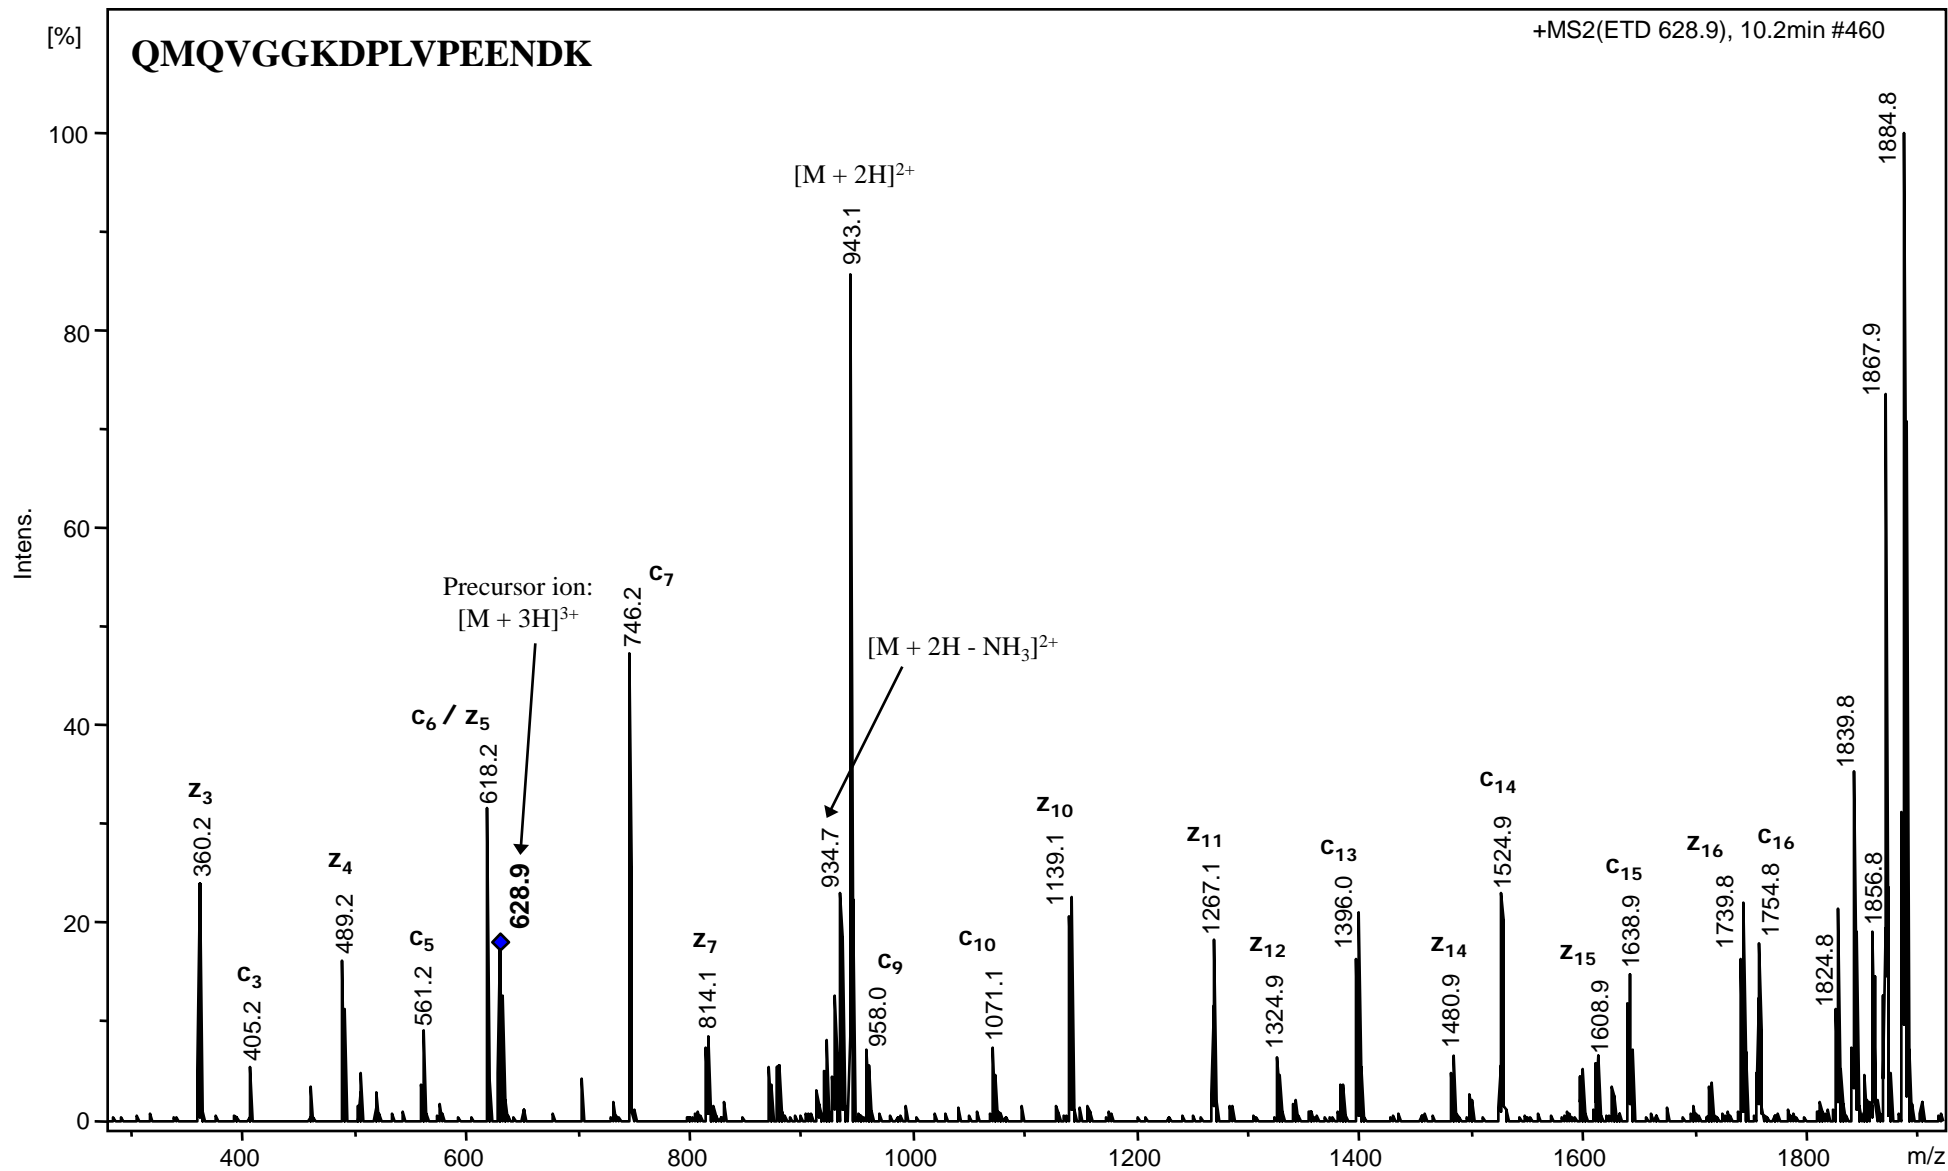

**Figure S6.** LC-ESI-ETD MS/MS spectrum of  $[M + 3H]^{3+}$  precursor ion  $m/z$  628.9 of QMQVGGKDPLVPEENDK, residues (29 - 45) of  $\omega$  subunit of *E. coli* RNAP.

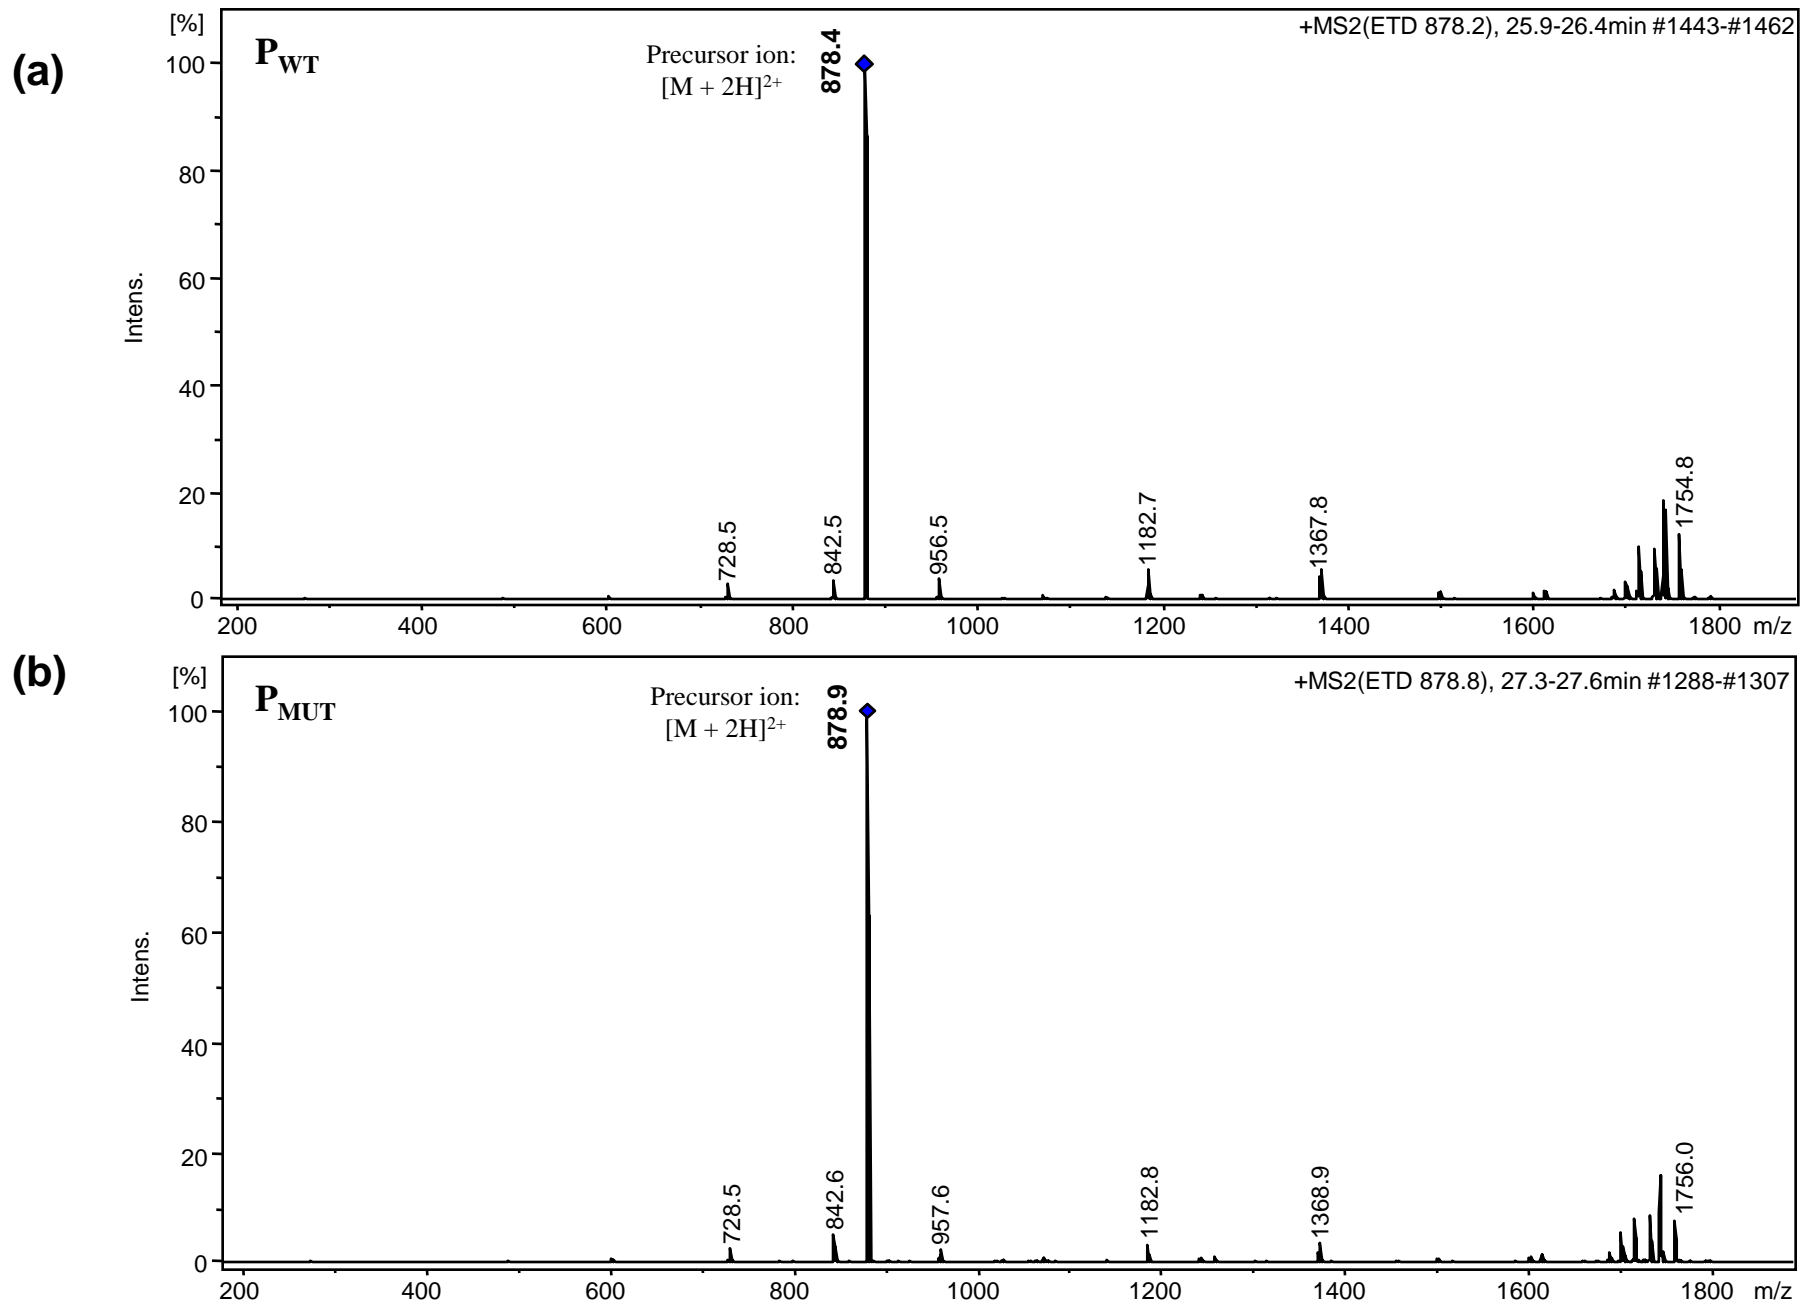

**Figure S7.** LC-ESI-ETD MS/MS spectrum of **(a)**  $[M + 2H]^{2+}$  precursor ion m/z 878.4 of  $P_{WT}$  and **(b)**  $[M + 2H]^{2+}$  precursor ion m/z 878.9 of  $P_{MUT}$ .  $P_{WT}$ : EIEEGLINQILDVR and  $P_{MUT}$ : EIEEGLIDNQILDVR (residues 53 - 67 of wild-type and mutant of  $\omega$  subunit of *E. coli* RNAP).
